# Supplementary material
Source: publisher figshare collection journal article supplement (https://asha.figshare.com/articles/dataset/_/26767063)
Supplement: Supplementary file 1 [file 1]

## Supplemental Material S1. RT analysis.

Raw RT was used for the analysis. Transformation was done to address potential skewness of RT. However, the results from the log-transformed data did not differ from those obtained with the raw RT. Below is the distribution of RT and statistical analysis results.

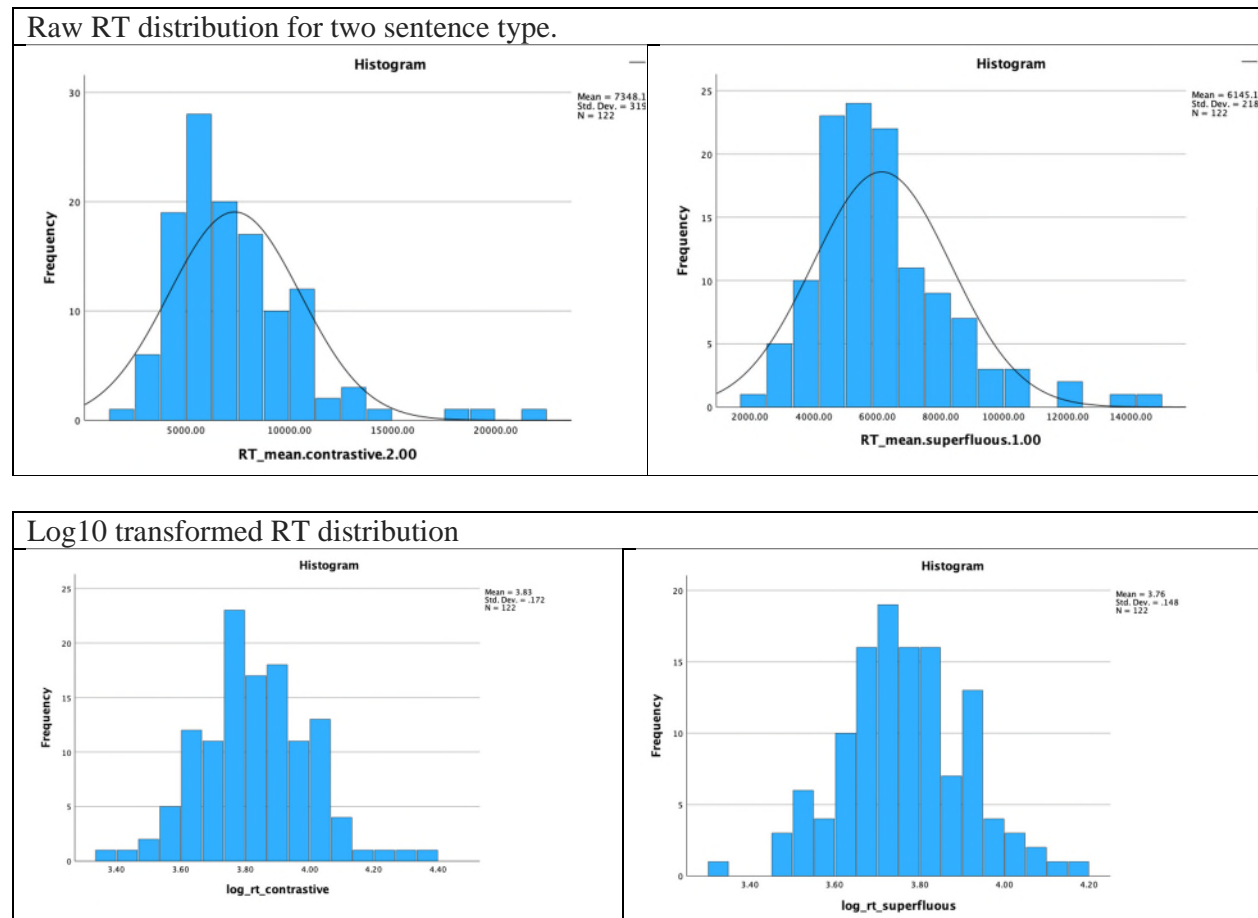

Paired *t*-tests were conducted on the RT for two types of sentences, and the results remained consistent in terms of interpretation both with and without the data transformation.

| Paired Samples Test |                                                      |                    |                |                 |                                           |              |        |             |             |
|---------------------|------------------------------------------------------|--------------------|----------------|-----------------|-------------------------------------------|--------------|--------|-------------|-------------|
|                     |                                                      | Paired Differences |                |                 |                                           | Significance |        |             |             |
|                     |                                                      | Mean               | Std. Deviation | Std. Error Mean | 95% Confidence Interval of the Difference | t            | df     | One-Sided p | Two-Sided p |
|                     |                                                      |                    |                |                 | Lower                                     | Upper        |        |             |             |
| Pair 1              | log_rt_contrastive – log_rt_superfluuous             | .06812             | .06663         | .00603          | .05617                                    | .08006       | 11.292 | 121         | <.001       |
| Pair 2              | RT_mean.contrastive.2.00 – RT_mean.superfluuous.1.00 | 1202.98361         | 1469.97021     | 133.08485       | 939.50704                                 | 1466.46017   | 9.039  | 121         | <.001       |
