# Supplementary material
Source: publisher figshare collection journal article supplement (https://asha.figshare.com/articles/dataset/_/26767063)

## Supplemental Material S2. Analysis of residuals.

The residual analysis did not reveal any fundamental flaws in the model. This suggested that the model was appropriate for the data despite the low variance explained by working memory.

Residual plots below did not indicate any obvious patterns or deviations from homoscedasticity, suggesting that the error variances were consistent.

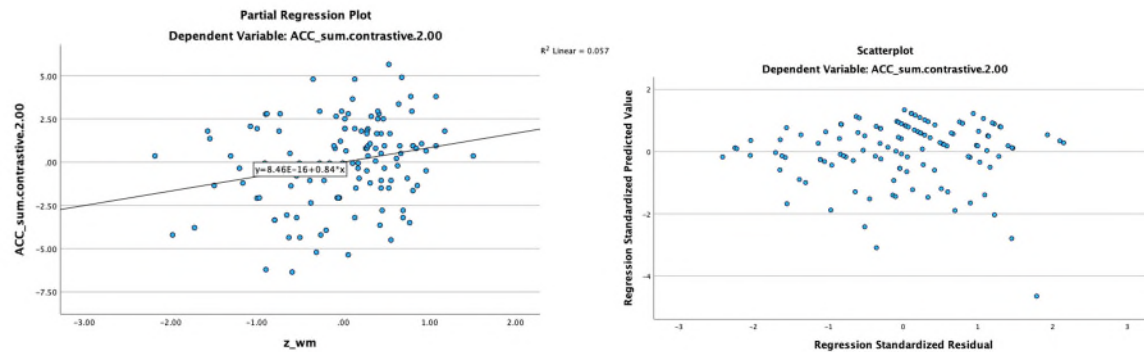

Normality of Residuals: Both histogram and  $Q-Q$  plots of the residuals indicated an approximation to normal distribution. Low Cook's Distance ( $< 0.4$ ).

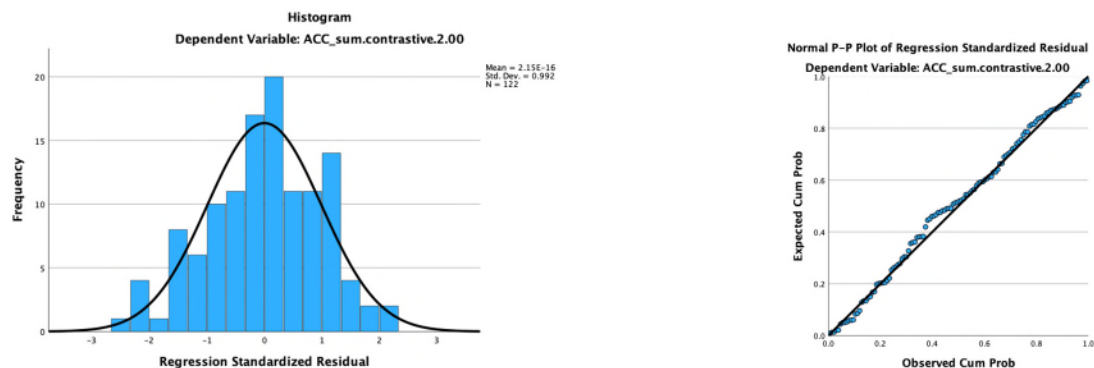

Supplement: Supplementary file 2 [file 1]
